# Supplementary material
Source: MDPI journal article supplement (https://www.mdpi.com/2073-8994/14/1/71)
Supplement: s1 [file s1]

## Supplementary Materials for:

### The Precision of the Human Hand: Variability in Pinch Strength and Manual Dexterity

Ameline Bardo <sup>1,2,\*</sup>, Katie Town <sup>2</sup>, Tracy L. Kivell <sup>2,3</sup>, Georgina Donati <sup>4</sup>, Haiko Ballieux <sup>5</sup>, Cosmin Stamate <sup>6</sup>, Trudi Edginton <sup>7</sup> and Gillian S. Forrester <sup>8</sup>

<sup>1</sup> UMR 7194 - HNHP, PaleoFED team, Département Homme et Environnement, Musée de l'Homme, 17 place du Trocadéro, 75016, Paris, France

<sup>2</sup> Skeletal Biology Research Centre, School of Anthropology and Conservation, University of Kent, Canterbury CT2 7NR, UK; t.l.kivell@kent.ac.uk (T.L.K.); katietown@live.co.uk (K.T.)

<sup>3</sup> Department of Human Evolution, Max Planck Institute for Evolutionary Anthropology, D-04103 Leipzig, Germany

<sup>4</sup> Department of Psychiatry, University of Oxford, Warneford Hospital, Oxford OX3 7JX, UK; georgina.donati@psych.ox.ac.uk

<sup>5</sup> Psychology, School of Social Sciences, University of Westminster, London W1W 6UW, UK; H.Ballieux@westminster.ac.uk

<sup>6</sup> Department of Computer Science, Birkbeck, University of London, London WC1E 7HX, UK; cosmin@dcs.bbk.ac.uk

<sup>7</sup> Department of Psychology, City, University of London, London EC1V 0HB, UK; Trudi.Edginton@city.ac.uk

<sup>8</sup> Department of Psychological Sciences, Birkbeck, University of London, Malet Street, London W1CE 7HX, UK; g.forrester@bbk.ac.uk

\* Correspondence: ameline.bardo@mnhn.fr

**Table S1.** Summary statistics for pinch grip strength (lbs) of both hands by age categories and for each sex, for handedness and for each lifestyle factor (occupation, playing a musical instrument, playing sport) tested.

|                                  |     |      | Age (years) |       |       |       |       |       |
|----------------------------------|-----|------|-------------|-------|-------|-------|-------|-------|
|                                  |     |      | 17-29       |       | 30-44 |       | 45+   |       |
|                                  |     |      | M           | F     | M     | F     | M     | F     |
| Age rank                         | DH  | Mean | 15.04       | 11.11 | 18.04 | 11.93 | 16.05 | 11.24 |
|                                  |     | SD   | 3.69        | 2.10  | 4.06  | 2.63  | 4.13  | 2.86  |
|                                  | NDH | Mean | 14.70       | 10.47 | 17.24 | 11.40 | 15.20 | 10.86 |
|                                  |     | SD   | 3.66        | 2.15  | 4.12  | 2.44  | 3.79  | 2.70  |
| Right-handed                     | DH  | Mean | 15.26       | 11.13 | 18.40 | 11.98 | 16.08 | 11.17 |
|                                  |     | SD   | 3.68        | 2.08  | 4.03  | 2.65  | 4.28  | 2.86  |
|                                  | NDH | Mean | 14.83       | 10.46 | 17.51 | 11.42 | 15.41 | 10.75 |
|                                  |     | SD   | 3.65        | 2.16  | 4.17  | 2.46  | 3.89  | 2.63  |
| Left-handed                      | DH  | Mean | 12.81       | 10.91 | 14.86 | 11.44 | 15.83 | 12.06 |
|                                  |     | SD   | 3.22        | 2.45  | 2.85  | 2.54  | 2.46  | 2.94  |
|                                  | NDH | Mean | 13.37       | 10.60 | 14.78 | 11.06 | 13.17 | 12.18 |
|                                  |     | SD   | 3.74        | 2.15  | 2.75  | 2.31  | 1.72  | 3.26  |
| Office Work                      | DH  | Mean | 14.70       | 11.06 | 18.05 | 12.01 | 16.15 | 11.22 |
|                                  |     | SD   | 3.60        | 2.13  | 4.10  | 2.72  | 4.04  | 2.87  |
|                                  | NDH | Mean | 14.17       | 10.40 | 17.10 | 11.35 | 15.02 | 10.84 |
|                                  |     | SD   | 3.50        | 2.08  | 4.08  | 2.44  | 3.77  | 2.68  |
| Precision Manual Work            | DH  | Mean | 17.31       | 11.04 | 19.67 | 11.27 | 14.42 | 11.40 |
|                                  |     | SD   | 3.79        | 1.40  | 4.04  | 2.01  | 5.40  | 3.20  |
|                                  | NDH | Mean | 18.19       | 10.15 | 17.83 | 11.35 | 14.92 | 10.80 |
|                                  |     | SD   | 3.35        | 1.60  | 5.40  | 2.58  | 4.26  | 2.90  |
| Forceful Manual Work             | DH  | Mean | 15.78       | 11.81 | 17.63 | 12.37 | 17.67 | 11.25 |
|                                  |     | SD   | 3.90        | 2.63  | 4.10  | 2.40  | 3.33  | 2.48  |
|                                  | NDH | Mean | 15.81       | 11.98 | 17.80 | 12.50 | 19.00 | 11.75 |
|                                  |     | SD   | 3.70        | 3.10  | 4.31  | 2.38  | 0.50  | 3.89  |
| Playing a Musical Instrument     | DH  | Mean | 14.43       | 10.72 | 18.96 | 11.97 | 15.33 | 11.27 |
|                                  |     | SD   | 3.10        | 1.97  | 4.34  | 2.22  | 3.54  | 3.01  |
|                                  | NDH | Mean | 13.92       | 10.12 | 17.80 | 11.32 | 14.28 | 10.94 |
|                                  |     | SD   | 2.98        | 1.85  | 4.80  | 2.03  | 3.65  | 2.43  |
| NOT Playing a Musical Instrument | DH  | Mean | 15.41       | 11.36 | 17.52 | 11.92 | 16.30 | 11.23 |
|                                  |     | SD   | 4.00        | 2.15  | 3.84  | 2.80  | 4.31  | 2.84  |
|                                  | NDH | Mean | 15.17       | 10.70 | 16.92 | 11.42 | 15.51 | 10.83 |
|                                  |     | SD   | 3.40        | 2.31  | 3.70  | 2.60  | 3.82  | 2.77  |
| Practicing Sport                 | DH  | Mean | 15.22       | 11.30 | 18.38 | 12.12 | 16.83 | 11.62 |
|                                  |     | SD   | 3.71        | 2.10  | 4.06  | 2.78  | 4.44  | 2.61  |
|                                  | NDH | Mean | 14.77       | 10.75 | 17.54 | 11.34 | 15.71 | 11.00 |
|                                  |     | SD   | 3.68        | 2.11  | 4.30  | 2.62  | 4.03  | 2.53  |
| NOT Practicing Sport             | DH  | Mean | 14.25       | 10.85 | 17.30 | 11.77 | 14.78 | 10.85 |
|                                  |     | SD   | 3.63        | 2.11  | 4.04  | 2.51  | 3.24  | 3.09  |
|                                  | NDH | Mean | 14.36       | 10.08 | 16.55 | 11.43 | 14.38 | 10.70 |
|                                  |     | SD   | 3.69        | 2.18  | 3.70  | 2.30  | 3.28  | 2.87  |

Males (M), Females (F), Dominant hand (DH), Non-dominant hand (NDH), Standard deviation of the mean (SD).

**Table S2.** Summary statistics for pegboard task results (number of pegs correctly placed) of both hands by age categories and for each sex, for handedness and for each lifestyle factor (occupation, playing a musical instrument, playing sport) tested.

|                                  |     |      | Age (years) |       |       |       |       |       |
|----------------------------------|-----|------|-------------|-------|-------|-------|-------|-------|
|                                  |     |      | 17-29       |       | 30-44 |       | 45+   |       |
|                                  |     |      | M           | F     | M     | F     | M     | F     |
| Age rank                         | DH  | Mean | 25.63       | 28.17 | 26.65 | 28.40 | 23.50 | 26.42 |
|                                  |     | SD   | 3.15        | 3.51  | 3.55  | 3.54  | 3.80  | 4.40  |
|                                  | NDH | Mean | 23.80       | 25.12 | 24.29 | 25.55 | 21.51 | 23.67 |
|                                  |     | SD   | 3.48        | 3.45  | 3.09  | 3.47  | 3.31  | 3.77  |
| Right-handed                     | DH  | Mean | 25.72       | 28.22 | 26.64 | 28.38 | 23.37 | 26.4  |
|                                  |     | SD   | 3.21        | 3.50  | 3.42  | 3.53  | 3.72  | 4.35  |
|                                  | NDH | Mean | 23.75       | 25.08 | 24.26 | 25.32 | 21.37 | 23.56 |
|                                  |     | SD   | 3.40        | 3.47  | 3.01  | 3.38  | 3.31  | 3.64  |
| Left-handed                      | DH  | Mean | 24.75       | 27.64 | 26.71 | 28.56 | 24.67 | 26.75 |
|                                  |     | SD   | 2.49        | 3.75  | 4.92  | 3.09  | 4.67  | 5.23  |
|                                  | NDH | Mean | 24.25       | 25.54 | 24.57 | 28.11 | 22.83 | 25    |
|                                  |     | SD   | 4.46        | 3.30  | 3.95  | 3.62  | 3.31  | 5.18  |
| Office Work                      | DH  | Mean | 25.67       | 28.10 | 26.52 | 28.50 | 23.40 | 26.66 |
|                                  |     | SD   | 3.15        | 3.48  | 3.75  | 3.59  | 3.80  | 4.21  |
|                                  | NDH | Mean | 23.76       | 25.21 | 24.37 | 25.54 | 21.54 | 23.82 |
|                                  |     | SD   | 3.38        | 3.62  | 3.25  | 3.56  | 2.91  | 3.77  |
| Precision Manual Work            | DH  | Mean | 24.87       | 30    | 28    | 28.46 | 24.33 | 25.30 |
|                                  |     | SD   | 2.64        | 3.79  | 3     | 2.87  | 4.80  | 5.41  |
|                                  | NDH | Mean | 23.62       | 25.25 | 23.00 | 25.84 | 21.33 | 22.80 |
|                                  |     | SD   | 4.53        | 3.30  | 1.73  | 3.31  | 6.77s | 2.90  |
| Forceful Manual Work             | DH  | Mean | 26          | 26.44 | 26.91 | 25.50 | 23.66 | 21.50 |
|                                  |     | SD   | 3.89        | 2.65  | 2.81  | 3.87  | 1.52  | 6.36  |
|                                  | NDH | Mean | 24.37       | 23.89 | 24.25 | 24.75 | 21.33 | 21.00 |
|                                  |     | SD   | 3.78        | 2.57  | 2.63  | 2.21  | 0.58  | 8.48  |
| Playing a Musical Instrument     | DH  | Mean | 25.27       | 29    | 26.36 | 28.83 | 22.69 | 26.25 |
|                                  |     | SD   | 2.80        | 2.82  | 2.90  | 3.21  | 4.14  | 4.66  |
|                                  | NDH | Mean | 24.30       | 26.16 | 23.56 | 25.90 | 21.12 | 23.87 |
|                                  |     | SD   | 2.64        | 2.91  | 2.88  | 2.28  | 4.03  | 3.61  |
| NOT Playing a Musical Instrument | DH  | Mean | 25.85       | 27.63 | 26.81 | 28.22 | 23.76 | 26.48 |
|                                  |     | SD   | 3.35        | 3.82  | 3.90  | 3.66  | 3.67  | 4.33  |
|                                  | NDH | Mean | 23.50       | 24.44 | 24.70 | 25.42 | 21.63 | 23.60 |
|                                  |     | SD   | 3.91        | 3.62  | 3.15  | 3.83  | 3.07  | 3.83  |
| Practicing Sport                 | DH  | Mean | 25.66       | 27.95 | 27    | 28.27 | 23.87 | 27.13 |
|                                  |     | SD   | 3.26        | 3.41  | 3.34  | 3.85  | 3.07  | 4.06  |
|                                  | NDH | Mean | 23.74       | 24.95 | 24.14 | 25.35 | 21.59 | 24.36 |
|                                  |     | SD   | 3.41        | 3.76  | 3.07  | 3.89  | 2.70  | 3.37  |
| NOT Practicing Sport             | DH  | Mean | 25.5        | 28.46 | 25.86 | 28.49 | 22.87 | 25.68 |
|                                  |     | SD   | 2.68        | 3.65  | 3.97  | 3.28  | 4.75  | 4.64  |
|                                  | NDH | Mean | 24.06       | 25.35 | 24.62 | 25.72 | 21.37 | 22.94 |
|                                  |     | SD   | 3.92        | 2.98  | 3.17  | 3.09  | 4.18  | 4.05  |

Males (M), Females (F), Dominant hand (DH), Non-dominant hand (NDH), Standard deviation of the mean (SD).
